# Supplementary material for: Social Vulnerability of Brazilian Metropolitan Schools and Teachers’ Absence from Work Due to Vocal and Psychological Symptoms: A Multilevel Analysis
Source: Int J Environ Res Public Health. 2023 Feb 8;20(4):2972. doi: 10.3390/ijerph20042972 (PMC9966546; doi:10.3390/ijerph20042972)
Supplement: Supplementary file 1 [file ijerph-20-02972-s001.zip › ijerph-2150096-supplementary.pdf]

# Social vulnerability of Brazilian metropolitan schools and teachers' absence from work due to vocal and psychological symptoms: a multilevel analysis

## Supplementary Material

### Extended Methods

Let  $Y_{ij}$  be 1 if the  $i^{\text{th}}$  teacher at the  $j^{\text{th}}$  FU missed school due to a voice/psychological symptoms and zero otherwise, then the log odds of the  $i^{\text{th}}$  teacher at the  $j^{\text{th}}$  FU missing school was modeled as follows:

$$Y_{ij} \sim \text{Bernoulli}(P(Y_{ij}=1))$$

$$\text{Logit}[P(Y_{ij}=1 \mid \beta, u_{0j})] = \beta_0 + \beta_1 \text{Sex} + \beta_2 \text{Age}_{(35-44)} + \beta_3 \text{Age}_{(45-54)} + \beta_4 \text{Age}_{(\geq 55)} + \beta_5 \text{SVI}_{(\text{Median})} + \beta_6 \text{SVI}_{(\text{High})} + \dots + u_{0j}$$

Where,

Sex = 1 if Woman; 0 otherwise

Age<sub>(35-44)</sub> = 1 if 35-44 years old; 0 otherwise

Age<sub>(45-54)</sub> = 1 if 45-54 years old; 0 otherwise

Age<sub>(≥55)</sub> = 1 if ≥55 years old; 0 otherwise

SVI<sub>(Median)</sub> = 1 if Median SVI median level; 0 otherwise

SVI<sub>(High)</sub> = 1 if Median SVI high level; 0 otherwise

$\beta_0$  – is the intercept, represents the log odds of a teacher missing school in an average FU;

$u_{0j}$  – is the random intercept for FU, describes the variation of the  $j^{\text{th}}$  FU intercept relative to the average FU,  $u_{0j} \sim N(0, \sigma_{u0})$ ;

At an average FU (i.e. a FU whose random effect is equal to zero on the logit scale), the probability of  $Y=1$  is  $\frac{\exp(\beta_0 + \beta_1 \text{Sex} + \beta_2 \text{Age}_{(35-44)} + \beta_3 \text{Age}_{(45-54)} + \beta_4 \text{Age}_{(\geq 55)} + \beta_5 \text{SVI}_{(\text{Median})} + \beta_6 \text{SVI}_{(\text{High})} + \dots)}{1 + \exp(\beta_0 + \beta_1 \text{Sex} + \beta_2 \text{Age}_{(35-44)} + \beta_3 \text{Age}_{(45-54)} + \beta_4 \text{Age}_{(\geq 55)} + \beta_5 \text{SVI}_{(\text{Median})} + \beta_6 \text{SVI}_{(\text{High})} + \dots)}$ .

$\beta_{1...}$  – are the fixed effects of teacher's demographic characteristics, working conditions and the SVI, conditional on the FU intercept and other covariates, represent log odds of missing school when comparing two teachers, one presenting that characteristic relative to the reference level of the characteristic, but who share identical values on the remaining covariates and who also share the same FU average risk (i.e., the value of the random effect).

... represents all other fixed effects listed in the table below.

| Covariate                             | Categories                    |
|---------------------------------------|-------------------------------|
| Sex                                   | Male                          |
|                                       | Female                        |
| Age (years)                           | $\leq 34$                     |
|                                       | 35-44                         |
|                                       | 45-54                         |
|                                       | $\geq 55$                     |
| Working weeks longer than 40 hours    | No                            |
|                                       | Yes                           |
| Employment time (years)               | <10                           |
|                                       | 10-20                         |
|                                       | >20                           |
| Income from school in minimum wages   | > three                       |
|                                       | Up to three                   |
| Working in more than one school       | No                            |
|                                       | Yes                           |
| Working in another activity           | No                            |
|                                       | Yes                           |
| School administration                 | Private                       |
|                                       | Municipal                     |
|                                       | State                         |
|                                       | Federal                       |
| School size by the number of teachers | $\leq 10$                     |
|                                       | 10 - 20                       |
|                                       | 21-30                         |
|                                       | >30                           |
| Perception of intense noise at school | Never or almost never /Rarely |
|                                       | Often/Sometimes               |
| Student indiscipline                  | Never or almost never /Rarely |
|                                       | Often/Sometimes               |
| Roundtrip home-work commute           | 10 - 20                       |
|                                       | 21-50                         |

|                                                 |                               |
|-------------------------------------------------|-------------------------------|
| <b>(in minutes)</b>                             | >51                           |
| <b>Experiencing verbal violence in school</b>   | Never                         |
|                                                 | Once/twice or more            |
| <b>Experiencing physical violence in school</b> | Never                         |
|                                                 | Once/twice or more            |
| <b>Excessive workload</b>                       | Never or almost never /Rarely |
|                                                 | Often/Sometimes               |
| <b>Few opportunities to learn new things</b>    | Never or almost never /Rarely |
|                                                 | Often/Sometimes               |
| <b>Insufficient time to complete tasks</b>      | Never or almost never /Rarely |
|                                                 | Often/Sometimes               |
| <b>Limited autonomy</b>                         | Never or almost never /Rarely |
|                                                 | Often/Sometimes               |
| <b>Low social support</b>                       | Never or almost never /Rarely |
|                                                 | Often/Sometimes               |
| <b>SVI of the municipalities</b>                | Low                           |
|                                                 | Median                        |
|                                                 | High                          |
